# Supplementary material
Source: Springer Nature journal article supplement (https://www.springermedizin.de/resource/supplementary/12936_2012_2580_MOESM2_ESM.pdf/9543264)

P  
e  
r  
c  
e  
n  
t  
a  
g  
e

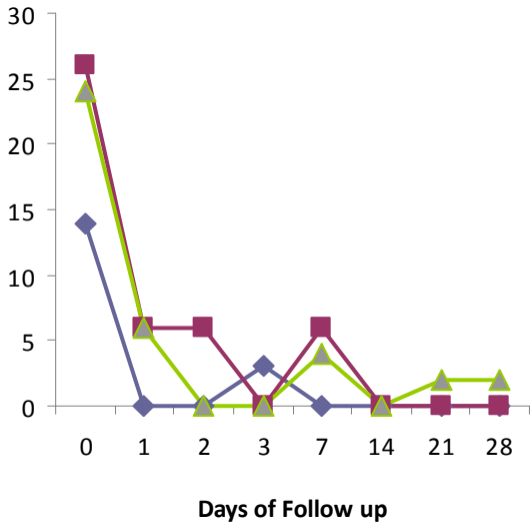

Supplement: MOESM2 [file 9543264]
